# Supplementary figures and images for: The Impact of Economic Recessions on Depression, Anxiety, and Trauma-Related Disorders and Illness Outcomes—A Scoping Review
Source: MDPI journal article supplement (doi:10.3390/bs11090119), 2021-08-31

Figure S1. Literature Search Flowchart

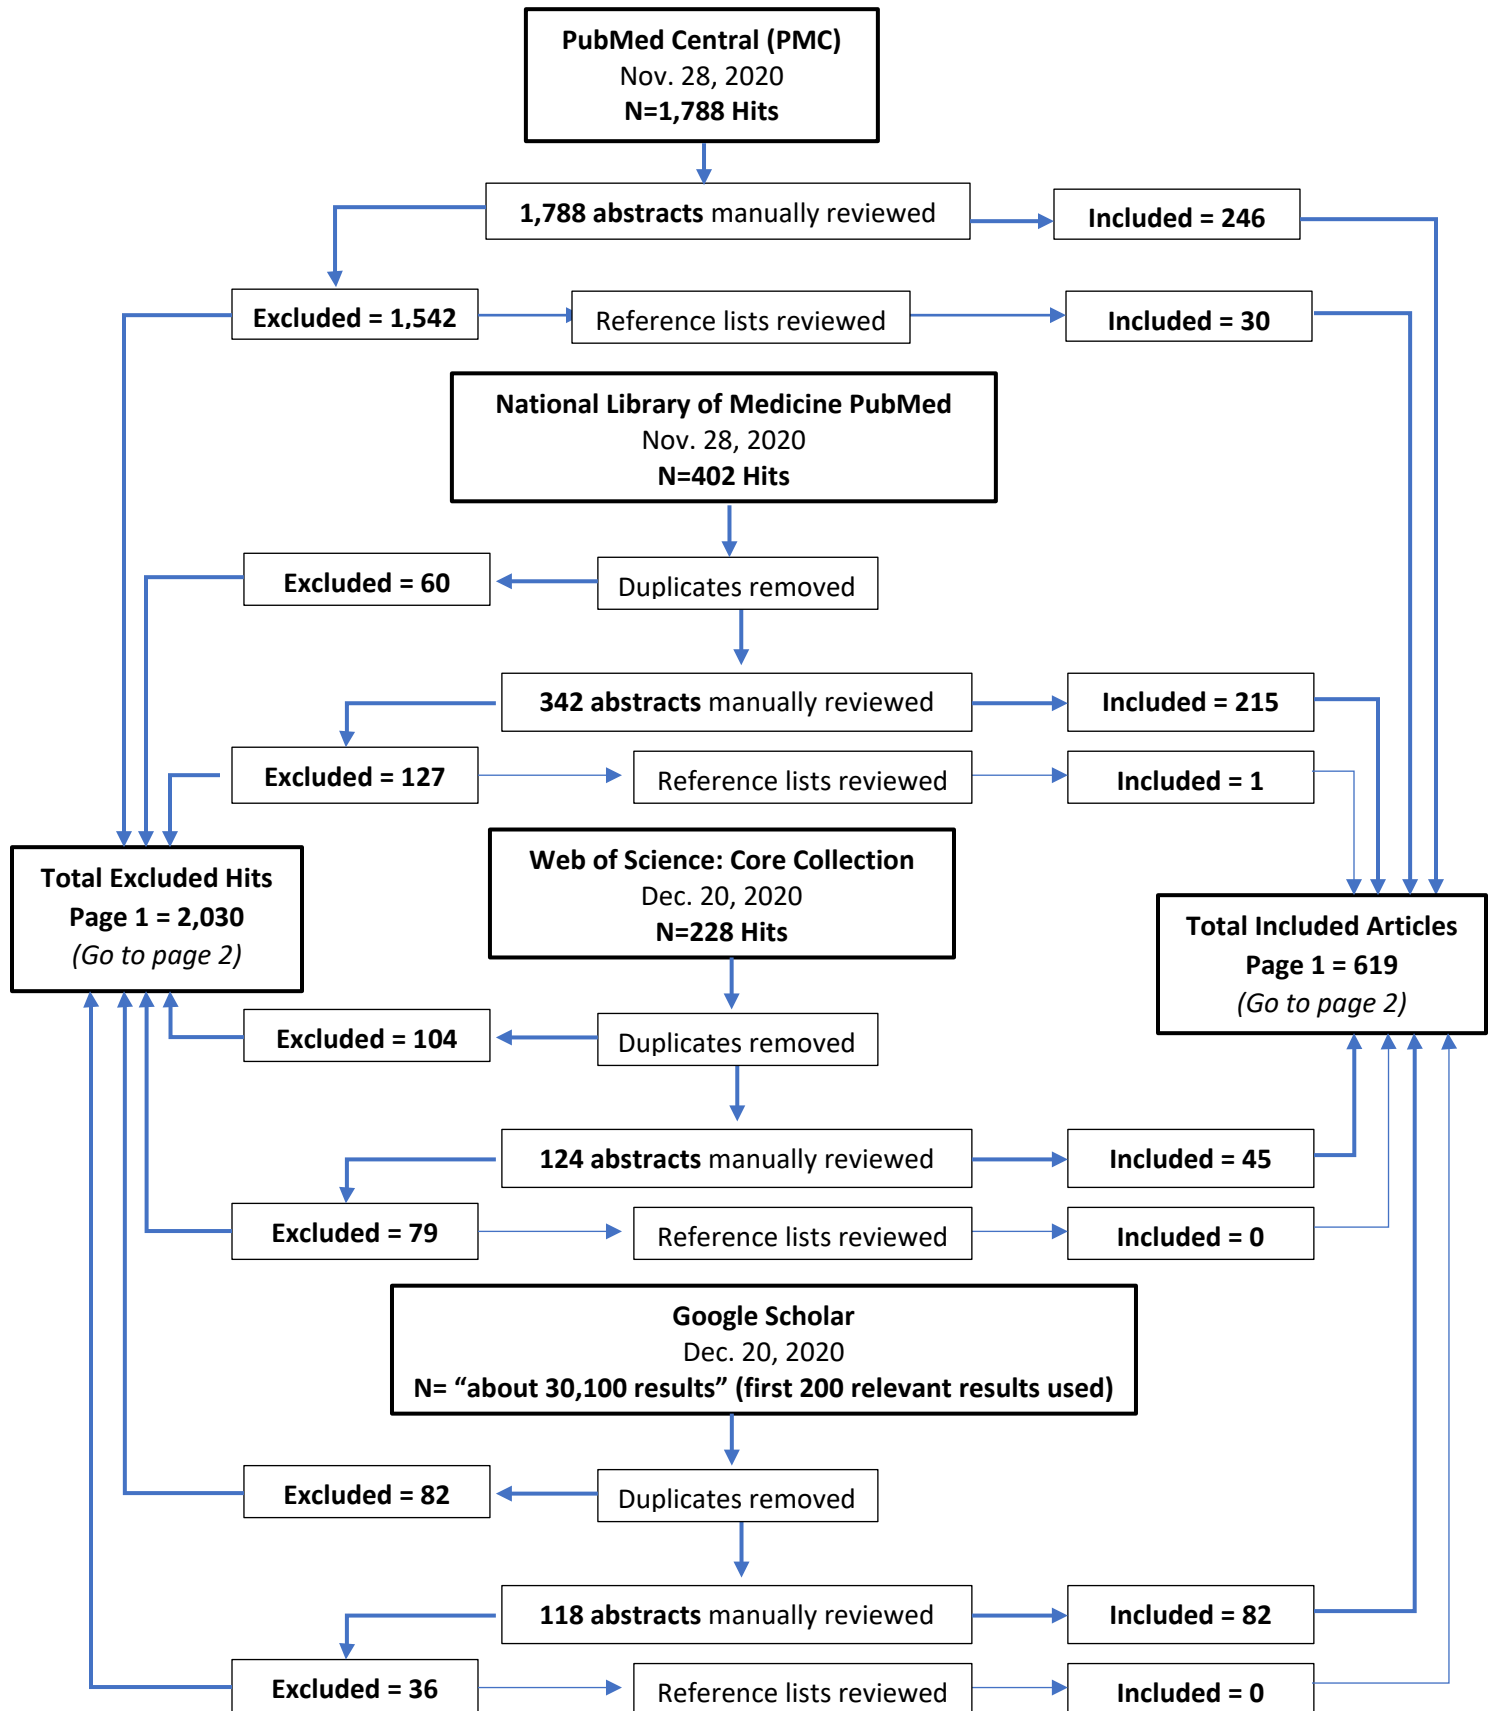

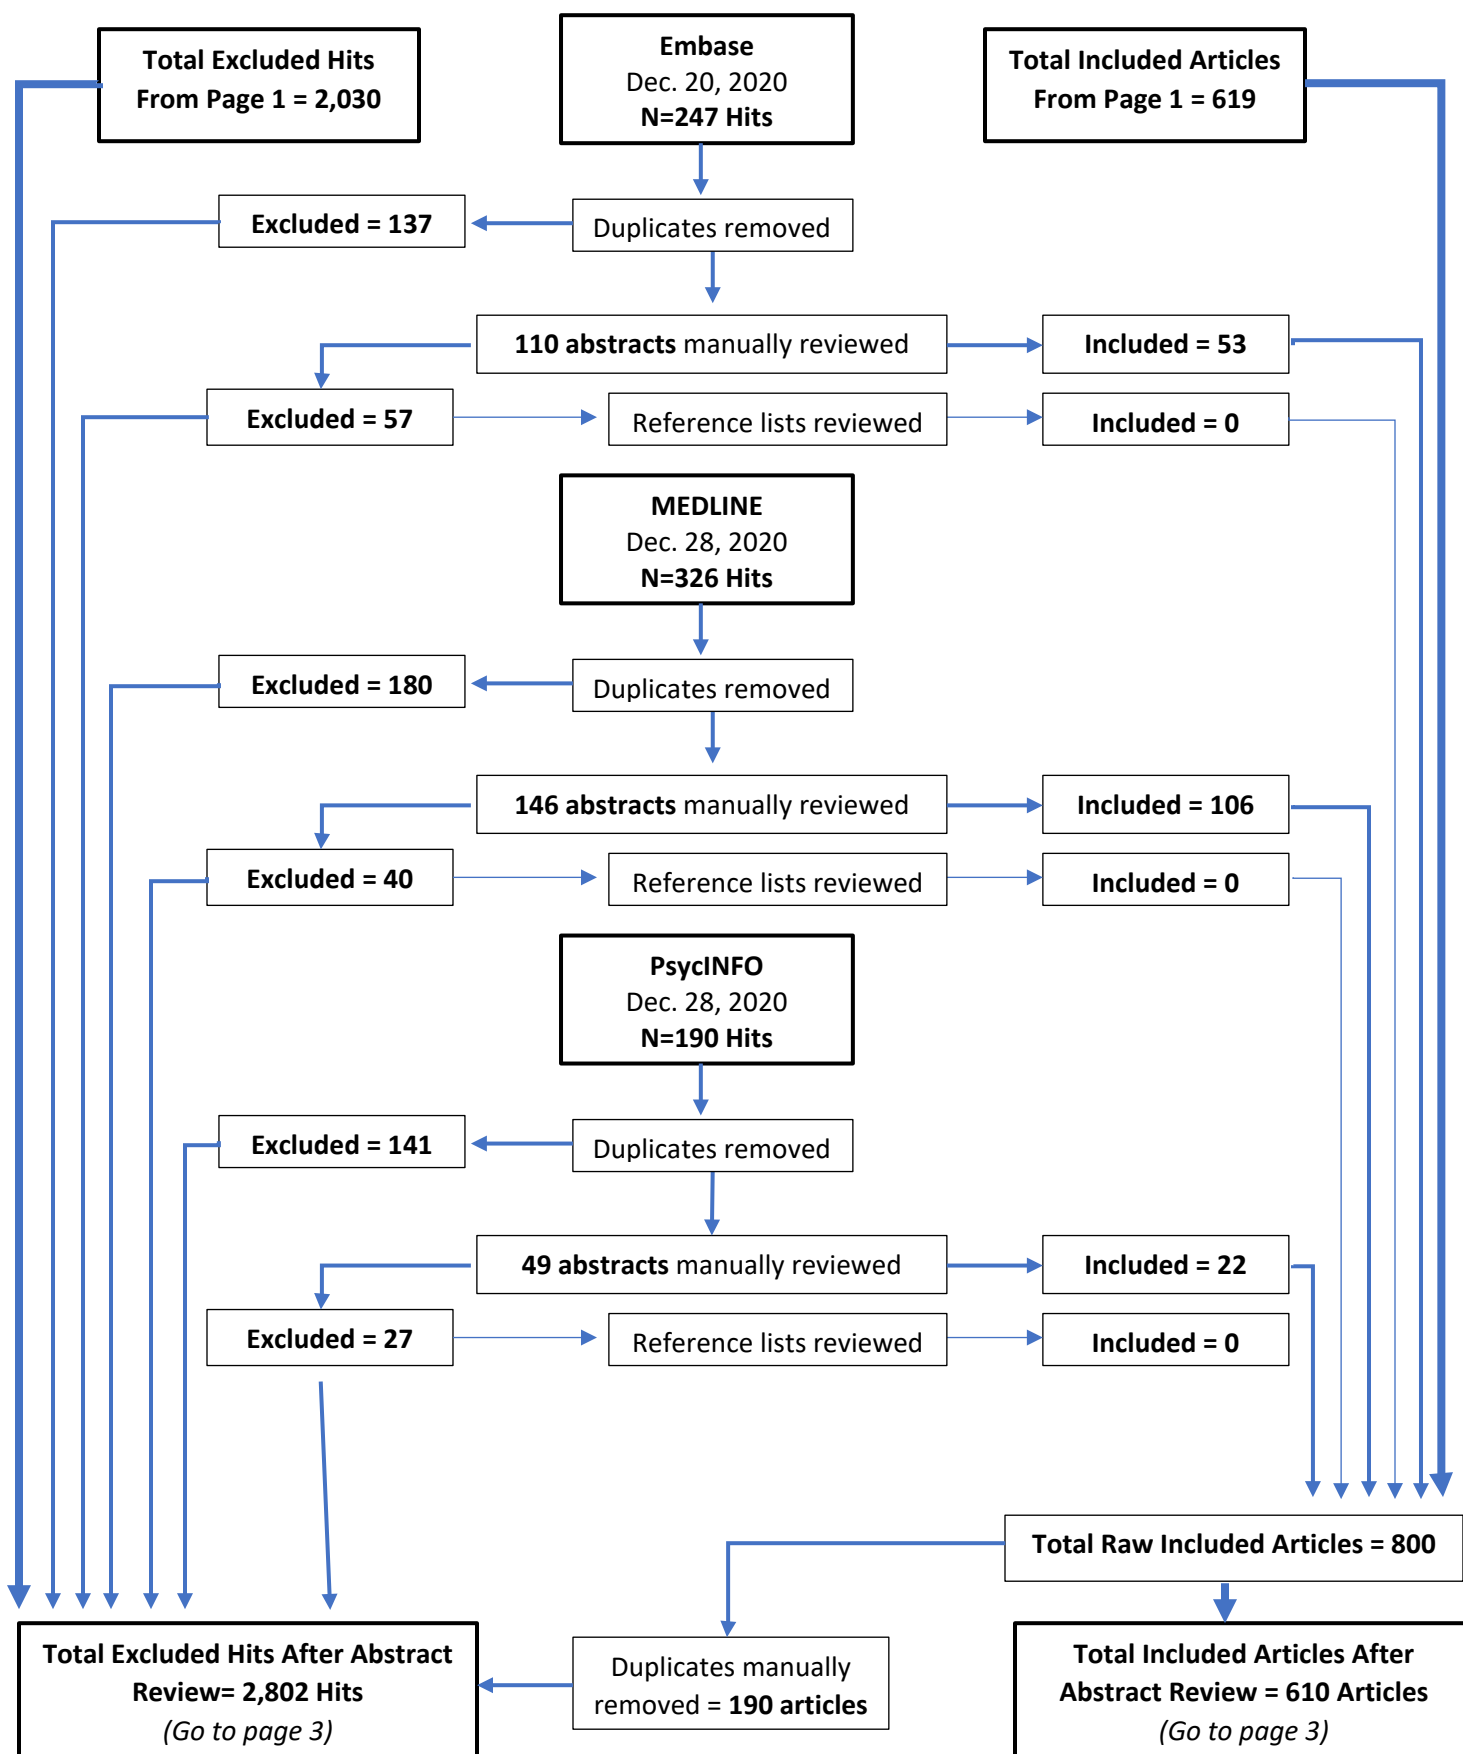

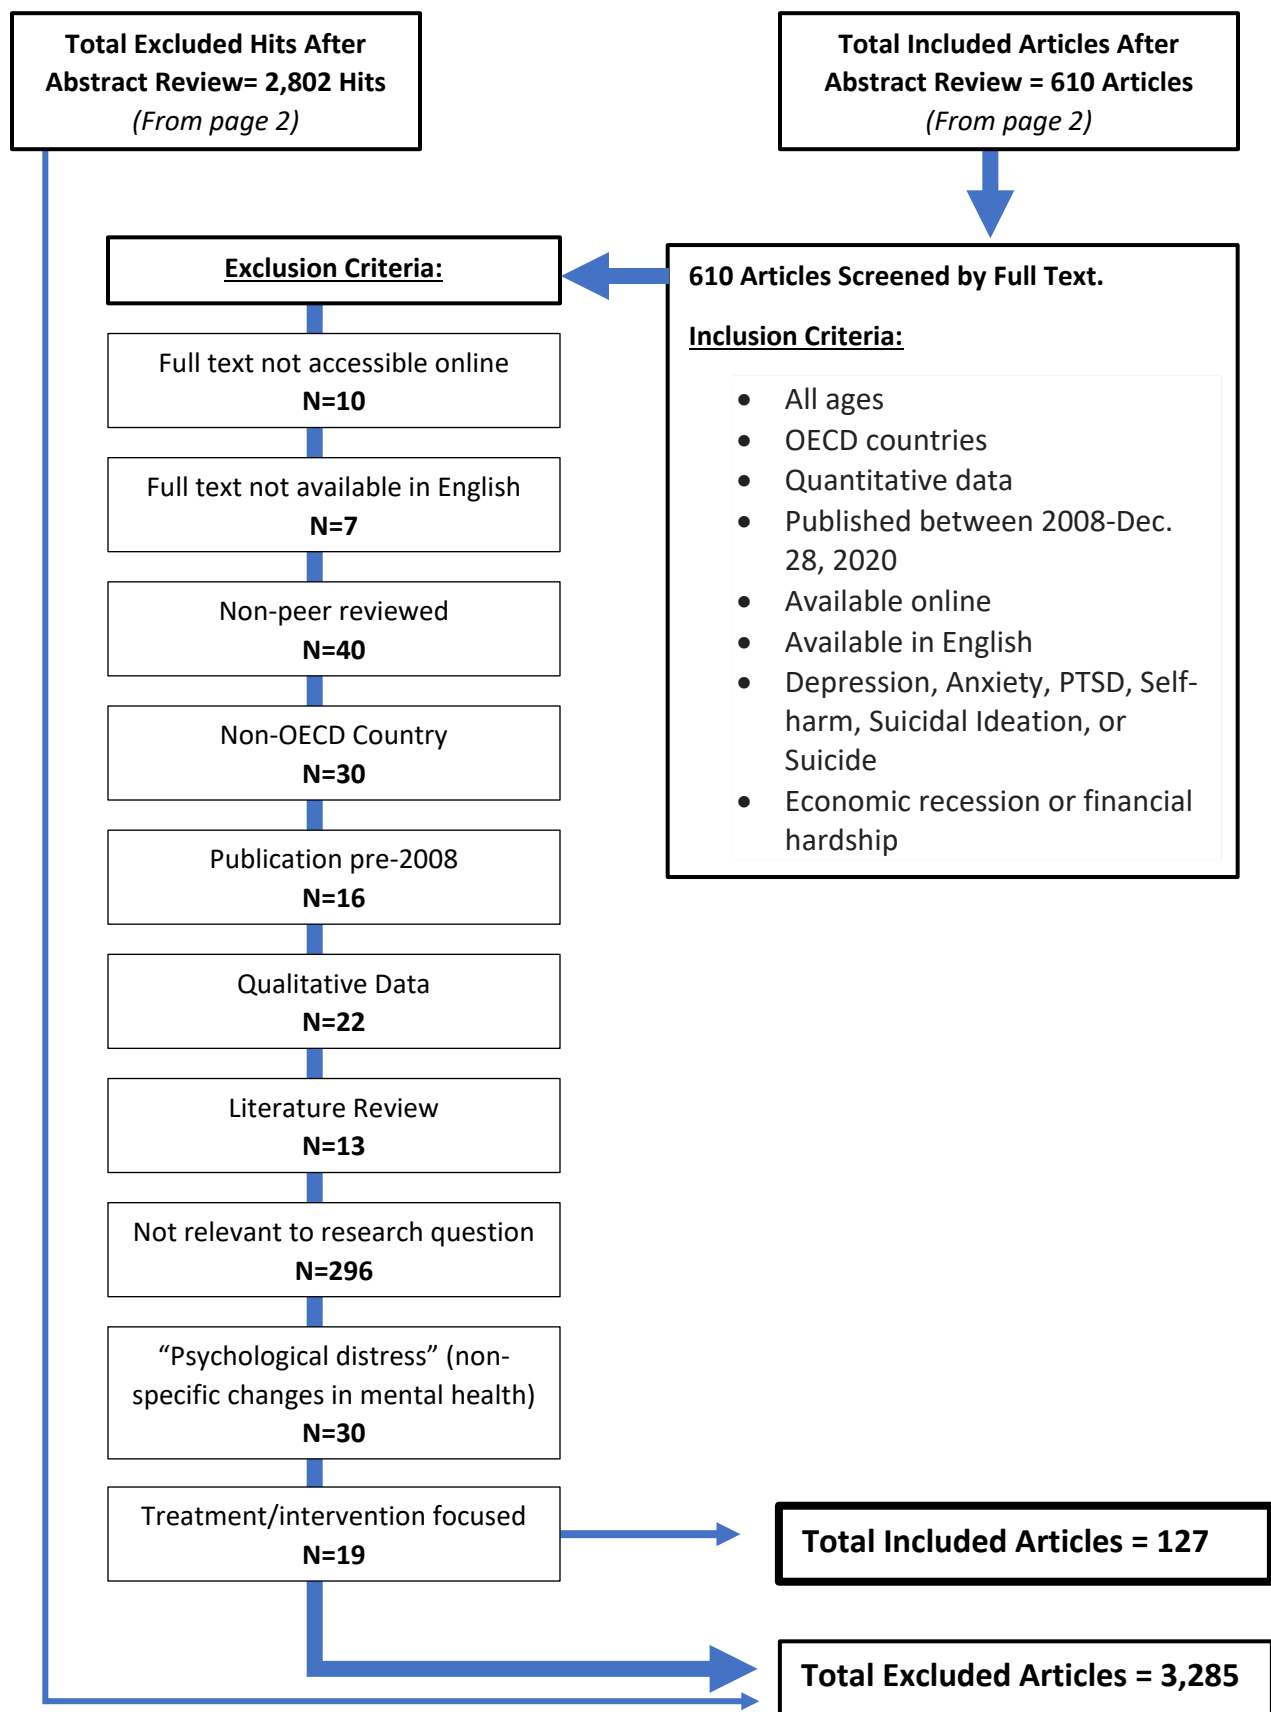

Supplement: s1 [file s1]
